# Supplementary material for: Contact tracing indicators for COVID-19: rapid scoping review and conceptual framework
Source: bioRxiv or medRxiv preprint supplement (doi:10.1101/2021.05.13.21257067), 2021-05-19
Supplement: Supplementary file [file media-1.pdf]

Grey literature

| Resource                                                                            | Resource URL                                                                                                                                                            |
|-------------------------------------------------------------------------------------|-------------------------------------------------------------------------------------------------------------------------------------------------------------------------|
| CADTH                                                                               | <a href="https://www.cadth.ca/">https://www.cadth.ca/</a>                                                                                                               |
| Disaster Lit                                                                        | <a href="https://disasterinfo.nlm.nih.gov/search/">https://disasterinfo.nlm.nih.gov/search/</a>                                                                         |
| European PMC                                                                        | <a href="https://europepmc.org/">https://europepmc.org/</a>                                                                                                             |
| Evidence Aid (Coronavirus collection)                                               | <a href="https://evidenceaid.org/evidence/coronavirus-covid-19/">https://evidenceaid.org/evidence/coronavirus-covid-19/</a>                                             |
| IEEE Xplore                                                                         | <a href="https://ieeexplore.ieee.org/Xplore/home.jsp">https://ieeexplore.ieee.org/Xplore/home.jsp</a>                                                                   |
| National Collaborating Centre for Methods and Tools-COVID-19 Rapid Evidence Reviews | <a href="https://www.nccmt.ca/covid-19/covid-19-evidence-reviews">https://www.nccmt.ca/covid-19/covid-19-evidence-reviews</a>                                           |
| NIH iSearch COVID-19 Portfolio                                                      | <a href="https://icite.od.nih.gov/covid19/search/">https://icite.od.nih.gov/covid19/search/</a>                                                                         |
| NLM HSRIC                                                                           | <a href="https://hsric.nlm.nih.gov/hsric_public/">https://hsric.nlm.nih.gov/hsric_public/</a>                                                                           |
| NLM HSRProj                                                                         | <a href="https://hsrproject.nlm.nih.gov">https://hsrproject.nlm.nih.gov</a>                                                                                             |
| OSF Preprints                                                                       | <a href="https://osf.io/preprints/">https://osf.io/preprints/</a>                                                                                                       |
| VA Evidence Synthesis Program – COVID-19 Reviews                                    | <a href="https://www.covid19reviews.org/">https://www.covid19reviews.org/</a>                                                                                           |
| WHO COVID-19 Global Literature Database                                             | <a href="https://search.bvsalud.org/global-literature-on-novel-coronavirus-2019-ncov/">https://search.bvsalud.org/global-literature-on-novel-coronavirus-2019-ncov/</a> |
| WHO GOARN Contact Tracing Document Repository                                       | <a href="https://extranet.who.int/goarn/partner-resources-content/447">https://extranet.who.int/goarn/partner-resources-content/447</a>                                 |
