# Supplementary material for: Contact tracing indicators for COVID-19: rapid scoping review and conceptual framework
Source: medRxiv preprint, doi:10.1101/2021.05.13.21257067, version 1 (2021-05-19)
Supplement: Supporting Information File 3: Included resources [file 257067_file05.pdf]

Included resources

| Pre-processed search                                                                                                                                                                                                                                                                                                                                         |            | Fulltext   | Article base/Methodology | Geographical scope                     |
|--------------------------------------------------------------------------------------------------------------------------------------------------------------------------------------------------------------------------------------------------------------------------------------------------------------------------------------------------------------|------------|------------|--------------------------|----------------------------------------|
| 1. COVID                                                                                                                                                                                                                                                                                                                                                     |            |            |                          |                                        |
| 2. <a href="#">Alonso DE, Bero A, Martinez ME. Smartphone usage patterns as a proxy indicator for contact tracing effectiveness: a systematic review with the WHO CoV-19 research landscape in South Korea. <i>Int J Infect Dis</i>. 2020 Jun 30;98:406-414. doi: 10.1016/j.ijid.2020.07.008. Epub 2020 Aug 6. PMID: 32774434; PMCID: PMC7389176.</a>        |            | 2020-08-06 | 2020-08-06               | International data analysis            |
| 3. <a href="#">Chen X, Chen Shaojun. The Association of Public Health Measures in COVID-19 and Healthcare Workers' Emotional Distress. <i>J Psychiatr Res</i>. 2020; 242:10-17. Epub 2020 Apr 17. doi: 10.1016/j.jpsychres.2020.04.016. PMID: 32437663.</a>                                                                                                  |            | 2020-04-17 | 2020-04-17               | Psychiatry                             |
| 4. <a href="#">Kumar S, Sharma S, Gupta S, et al. Impact of Public Health Measures in Controlling COVID-19 Pandemic: A Systematic Review and Meta-Analysis of Published Literature. <i>Indian J Public Health</i>. 2020; 64(3):201-207. doi: 10.4103/ijph.2020.241414. PMID: 32474141.</a>                                                                   |            | 2020-07-13 | 2020-07-13               | International Journal of Public Health |
| 5. <a href="#">Liu Y, Chen Y, Chen Y, et al. The Effect of Public Health Measures on the Spread of COVID-19: A Systematic Review and Meta-Analysis. <i>Chin J Epidemiol</i>. 2020; 51(10):1101-1106. doi: 10.3760/cjcp10010.2020.05.008. PMID: 32474141.</a>                                                                                                 |            | 2020-07-13 | 2020-07-13               | China                                  |
| 6. <a href="#">Zhang H, Chen Y, Chen Y, et al. The Effect of Public Health Measures on the Spread of COVID-19: A Systematic Review and Meta-Analysis. <i>Chin J Epidemiol</i>. 2020; 51(10):1101-1106. doi: 10.3760/cjcp10010.2020.05.008. PMID: 32474141.</a>                                                                                               |            | 2020-07-13 | 2020-07-13               | China                                  |
| 7. <a href="#">Zhang H, Chen Y, Chen Y, et al. The Effect of Public Health Measures on the Spread of COVID-19: A Systematic Review and Meta-Analysis. <i>Chin J Epidemiol</i>. 2020; 51(10):1101-1106. doi: 10.3760/cjcp10010.2020.05.008. PMID: 32474141.</a>                                                                                               |            | 2020-07-13 | 2020-07-13               | China                                  |
| 8. <a href="#">Zhang H, Chen Y, Chen Y, et al. The Effect of Public Health Measures on the Spread of COVID-19: A Systematic Review and Meta-Analysis. <i>Chin J Epidemiol</i>. 2020; 51(10):1101-1106. doi: 10.3760/cjcp10010.2020.05.008. PMID: 32474141.</a>                                                                                               |            | 2020-07-13 | 2020-07-13               | China                                  |
| 9. <a href="#">Zhang H, Chen Y, Chen Y, et al. The Effect of Public Health Measures on the Spread of COVID-19: A Systematic Review and Meta-Analysis. <i>Chin J Epidemiol</i>. 2020; 51(10):1101-1106. doi: 10.3760/cjcp10010.2020.05.008. PMID: 32474141.</a>                                                                                               |            | 2020-07-13 | 2020-07-13               | China                                  |
| 10. <a href="#">Zhang H, Chen Y, Chen Y, et al. The Effect of Public Health Measures on the Spread of COVID-19: A Systematic Review and Meta-Analysis. <i>Chin J Epidemiol</i>. 2020; 51(10):1101-1106. doi: 10.3760/cjcp10010.2020.05.008. PMID: 32474141.</a>                                                                                              |            | 2020-07-13 | 2020-07-13               | China                                  |
| Geo-Refinement search                                                                                                                                                                                                                                                                                                                                        |            | Fulltext   | Article base/Methodology | Geographical scope                     |
| 1. COVID                                                                                                                                                                                                                                                                                                                                                     |            |            |                          |                                        |
| 2. <a href="#">Alonso DE, Bero A, Martinez ME, et al. Smartphone usage patterns as a proxy indicator for contact tracing effectiveness: a systematic review with the WHO CoV-19 research landscape in South Korea. <i>Int J Infect Dis</i>. 2020 Jun 30;98:406-414. doi: 10.1016/j.ijid.2020.07.008. Epub 2020 Aug 6. PMID: 32774434; PMCID: PMC7389176.</a> |            | 2020-08-06 | 2020-08-06               | International data analysis            |
| Search approach                                                                                                                                                                                                                                                                                                                                              |            |            |                          |                                        |
| 1. <a href="#">Alonso DE, Bero A, Martinez ME, et al. Smartphone usage patterns as a proxy indicator for contact tracing effectiveness: a systematic review with the WHO CoV-19 research landscape in South Korea. <i>Int J Infect Dis</i>. 2020 Jun 30;98:406-414. doi: 10.1016/j.ijid.2020.07.008. Epub 2020 Aug 6. PMID: 32774434; PMCID: PMC7389176.</a> | 2020-08-06 | 2020-08-06 | 2020-08-06               | International data analysis            |
| 2. <a href="#">Chen X, Chen Shaojun. The Association of Public Health Measures in COVID-19 and Healthcare Workers' Emotional Distress. <i>J Psychiatr Res</i>. 2020; 242:10-17. Epub 2020 Apr 17. doi: 10.1016/j.jpsychres.2020.04.016. PMID: 32437663.</a>                                                                                                  | 2020-04-17 | 2020-04-17 | 2020-04-17               | Psychiatry                             |
| 3. <a href="#">Kumar S, Sharma S, Gupta S, et al. Impact of Public Health Measures in Controlling COVID-19 Pandemic: A Systematic Review and Meta-Analysis of Published Literature. <i>Indian J Public Health</i>. 2020; 64(3):201-207. doi: 10.4103/ijph.2020.241414. PMID: 32474141.</a>                                                                   | 2020-07-13 | 2020-07-13 | 2020-07-13               | International Journal of Public Health |
| 4. <a href="#">Liu Y, Chen Y, Chen Y, et al. The Effect of Public Health Measures on the Spread of COVID-19: A Systematic Review and Meta-Analysis. <i>Chin J Epidemiol</i>. 2020; 51(10):1101-1106. doi: 10.3760/cjcp10010.2020.05.008. PMID: 32474141.</a>                                                                                                 | 2020-07-13 | 2020-07-13 | 2020-07-13               | China                                  |
| 5. <a href="#">Zhang H, Chen Y, Chen Y, et al. The Effect of Public Health Measures on the Spread of COVID-19: A Systematic Review and Meta-Analysis. <i>Chin J Epidemiol</i>. 2020; 51(10):1101-1106. doi: 10.3760/cjcp10010.2020.05.008. PMID: 32474141.</a>                                                                                               | 2020-07-13 | 2020-07-13 | 2020-07-13               | China                                  |
| 6. <a href="#">Zhang H, Chen Y, Chen Y, et al. The Effect of Public Health Measures on the Spread of COVID-19: A Systematic Review and Meta-Analysis. <i>Chin J Epidemiol</i>. 2020; 51(10):1101-1106. doi: 10.3760/cjcp10010.2020.05.008. PMID: 32474141.</a>                                                                                               | 2020-07-13 | 2020-07-13 | 2020-07-13               | China                                  |
| 7. <a href="#">Zhang H, Chen Y, Chen Y, et al. The Effect of Public Health Measures on the Spread of COVID-19: A Systematic Review and Meta-Analysis. <i>Chin J Epidemiol</i>. 2020; 51(10):1101-1106. doi: 10.3760/cjcp10010.2020.05.008. PMID: 32474141.</a>                                                                                               | 2020-07-13 | 2020-07-13 | 2020-07-13               | China                                  |
| 8. <a href="#">Zhang H, Chen Y, Chen Y, et al. The Effect of Public Health Measures on the Spread of COVID-19: A Systematic Review and Meta-Analysis. <i>Chin J Epidemiol</i>. 2020; 51(10):1101-1106. doi: 10.3760/cjcp10010.2020.05.008. PMID: 32474141.</a>                                                                                               | 2020-07-13 | 2020-07-13 | 2020-07-13               | China                                  |
| 9. <a href="#">Zhang H, Chen Y, Chen Y, et al. The Effect of Public Health Measures on the Spread of COVID-19: A Systematic Review and Meta-Analysis. <i>Chin J Epidemiol</i>. 2020; 51(10):1101-1106. doi: 10.3760/cjcp10010.2020.05.008. PMID: 32474141.</a>                                                                                               | 2020-07-13 | 2020-07-13 | 2020-07-13               | China                                  |
| 10. <a href="#">Zhang H, Chen Y, Chen Y, et al. The Effect of Public Health Measures on the Spread of COVID-19: A Systematic Review and Meta-Analysis. <i>Chin J Epidemiol</i>. 2020; 51(10):1101-1106. doi: 10.3760/cjcp10010.2020.05.008. PMID: 32474141.</a>                                                                                              | 2020-07-13 | 2020-07-13 | 2020-07-13               | China                                  |
